# Supplementary material
Source: publisher figshare collection journal article supplement (https://adisjournals.figshare.com/articles/dataset/_/6015683)
Supplement: Supplementary file 1 [file 1]

## Defining the Risk and Associated Morbidity and Mortality of Severe Respiratory Syncytial Virus Infection Among Infants with Chronic Lung Disease

Bosco Paes • Brigitte Fauroux • Josep Figueras-Aloy • Louis Bont • Paul A. Checchia • Eric A. F. Simões • Paolo Manzoni • Xavier Carbonell-Estrany

Infect Dis Ther. 2016 Dec;5(4):453-71

This slide deck represents the opinions of the authors. Sponsorship for this project was funded by AbbVie. Medical writing assistance for this study was provided by Strategen Limited. For a full list of acknowledgments and conflicts of interest for all authors of this article, please see the full text online. Copyright © The Authors 2017. Creative Commons Attribution Noncommercial License (CC BY-NC).

## Abbreviations

- BPD: Bronchopulmonary dysplasia
- CHD: Congenital heart disease
- CLD: Chronic lung disease
- ECMO: Extracorporeal membrane oxygenation
- ICU: Intensive care unit
- LOS: Length of stay
- MV: Mechanical ventilation
- NICU: Neonatal intensive care unit
- OR: Odds ratio
- RSV: Respiratory syncytial virus
- RSVH: Respiratory syncytial virus hospitalization
- SOE: Strength of evidence
- wGA: Weeks' gestational age

## REGAL 3: Associated morbidity and mortality of RSV in infants with CLD

- The methodology followed that of the predetermined protocol outlined in REGAL 1. The target population consisted of:
  - Infants and young children with BPD/CLD with ‘proven’ or ‘probable’ RSV
- Outcomes of interest for this review included:
  - Hospitalization rates due to severe RSV
  - Hospital LOS
  - ICU admission and LOS
  - Oxygen requirement
  - Need for and duration of MV and/or non-invasive ventilation
  - Case-fatality rates

‘What is the morbidity, long-term sequelae and mortality of infants and young children with BPD/CLD due to severe RSV infection?’

## Systematic review

- 1,836 studies\* were identified of which 38 were included

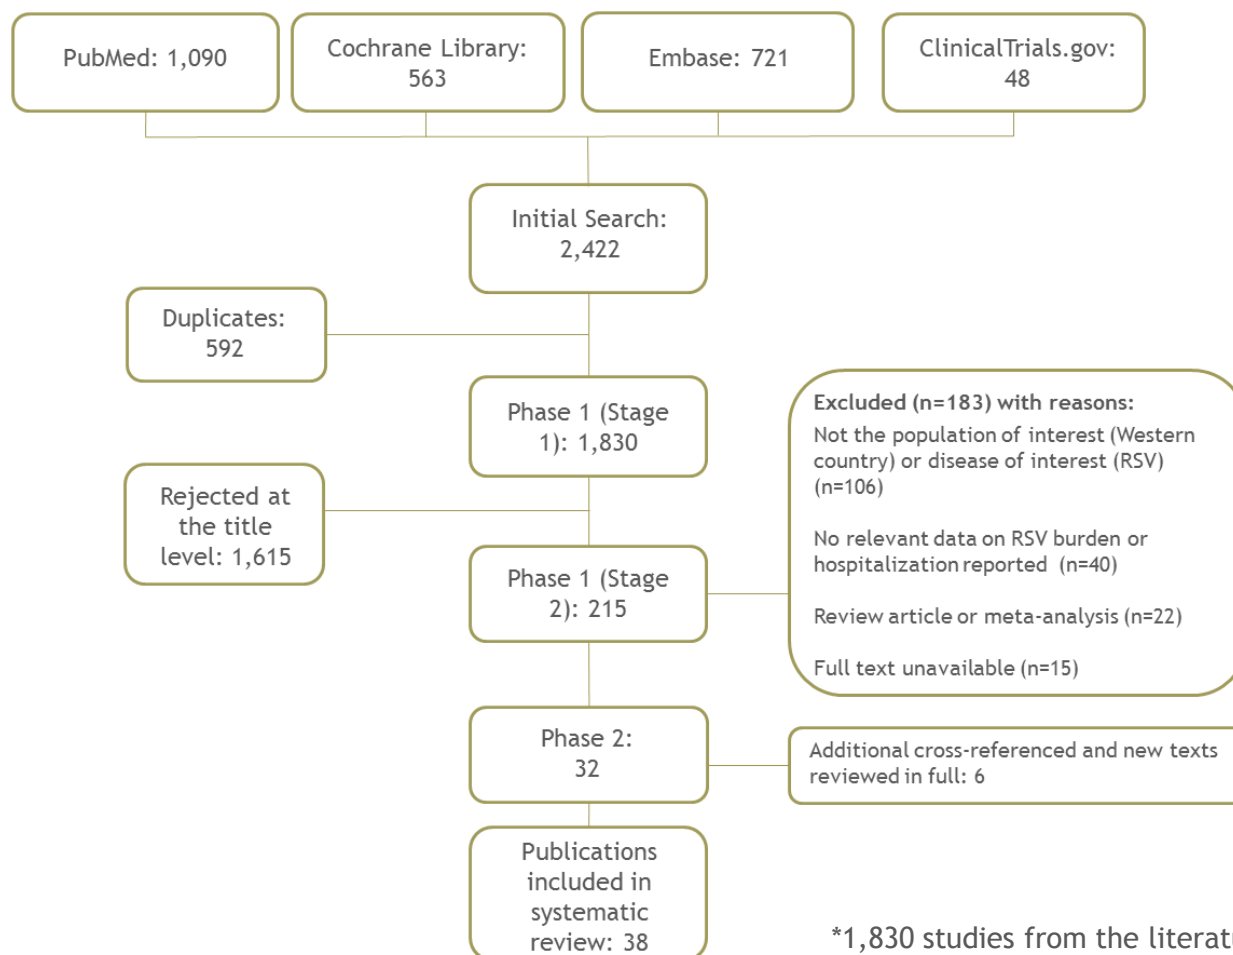

\*1,830 studies from the literature search (excluding duplicates) plus 6 additional cross-references

## Defining BPD/CLD

- “Original BPD” was based on the Northway classification
- “New BPD” definition targets extremely preterm infants with structurally immature lungs due to lung growth arrest
- Within this review, BPD was defined in infants born at <32 weeks post-menstrual age as follows:

| Severity     | Definition                                                                                                                                                                                                       |
|--------------|------------------------------------------------------------------------------------------------------------------------------------------------------------------------------------------------------------------|
| Mild BPD     | <ul style="list-style-type: none"><li>• Oxygen requirement for the first 28 days but room air at 36 weeks post-menstrual age</li></ul>                                                                           |
| Moderate BPD | <ul style="list-style-type: none"><li>• Oxygen requirement for the first 28 days and fraction of inspired oxygen &lt;30% at 36 weeks post-menstrual age</li></ul>                                                |
| Severe BPD   | <ul style="list-style-type: none"><li>• Oxygen requirement for the first 28 days and fraction of inspired oxygen &gt;30% and/or continuous positive airway pressure/MV at 36 weeks post-menstrual age.</li></ul> |

- For infants born >32 weeks' postmenstrual age, BPD/CLD was defined as 'continuous need for oxygen and/or respiratory support beyond 36 weeks post-menstrual age', adjusted to 56 days of life

## BPD/CLD was identified as a significant risk factor for RSVH (high SOE)

Studies reported ORs of

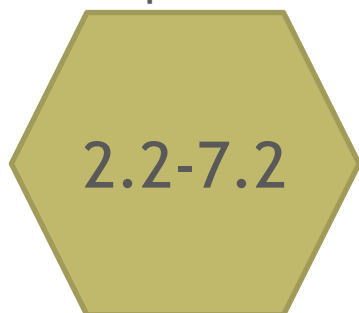

for BPD/CLD as a risk factor for RSVH

Incidence of RSVH was

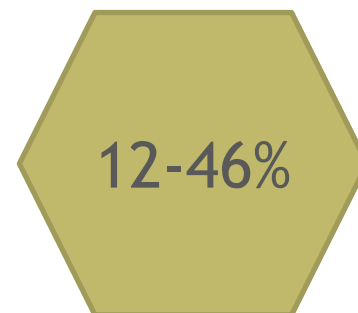

in infants with BPD/CLD who had not received RSV immunoprophylaxis

- During the first 2 years of life, **children with BPD/CLD** experienced RSVH at a **higher rate** than:
  - Children born at term ( $\geq 36$  wGA)
  - Children with CHD
  - Preterm infants without comorbidities

Infants with BPD/CLD had a significantly higher risk of RSVH compared to other high-risk groups

## RSV infection in infants with BPD/CLD led to significant morbidity and healthcare utilization (high SOE)

Typical hospital LOS for RSV infection was:

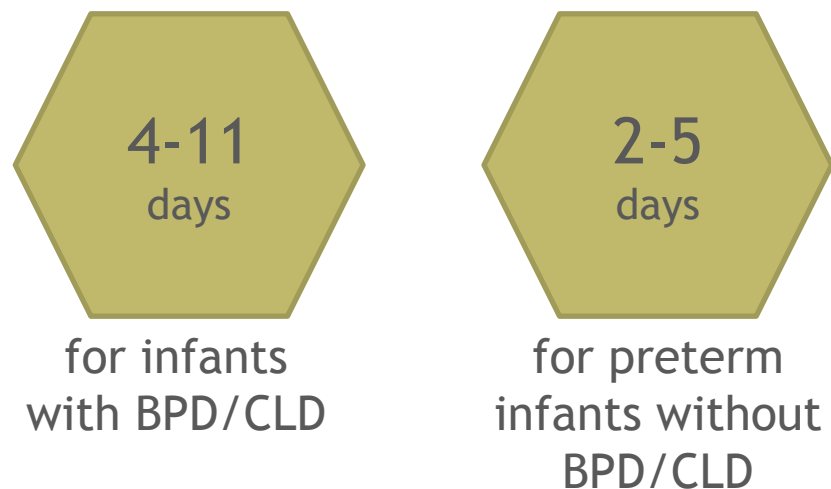

- Compared to term infants, RSVH among infants with BPD/CLD led to an **increase** in:
  - NICU admission
  - Oxygen supplementation
  - MV
- There were no data to indicate that case-fatality rates were higher in BPD/CLD than in healthy preterm or term infants

BPD/CLD was reported to be associated with a complicated course of disease and substantial healthcare costs

| Key Statements/Findings                                                                                                                             | Level of Evidence |
|-----------------------------------------------------------------------------------------------------------------------------------------------------|-------------------|
| BPD/CLD is a highly significant independent risk factor for RSVH (OR 2.2-7.2)                                                                       | 1                 |
| BPD/CLD is associated with a higher rate of RSVH compared to other high-risk groups (e.g. CHD, preterms without comorbidities) and term infants     | 1                 |
| The reported incidence of RSVH in infants and young children with BPD/CLD who have not received RSV immunoprophylaxis varies between 12 and 21%     | 1                 |
| Median hospital LOS for RSV infection in children with BPD/CLD is 4-11 days                                                                         | 1-2               |
| BPD/CLD is significantly and independently associated with a complicated course of disease, involving use of MV and/or requirement for ECMO support | 1-3               |

Infants with BPD/CLD were more susceptible to developing RSV with a more severe course of illness versus healthy infants



## Further development

- Key areas of research
  - More up-to-date research and specific studies are needed to investigate the burden of severe RSV infection in infants and young children with BPD/CLD
  - Comparison of the morbidity and mortality incurred by infants with ‘old’ versus ‘new’ BPD/CLD
- Improved surveillance programs would provide insight into the burden of RSV, and may help to improve outcomes and plan allocation of healthcare resources

## Acknowledgments

- Dr Joanne Smith, Julie Blake and Dr Barry Rodgers-Gray, from Strategen Limited, undertook the systematic review following protocol approval by the authors. AbbVie provided funding to Strategen to undertake the systematic review.
- All named authors meet the International Committee of Medical Journal Editors (ICMJE) criteria for authorship for this manuscript, take responsibility for the integrity of the work as a whole, and have given final approval to the version to be published.
- Editorial assistance in the preparation of this manuscript was provided by Julie Blake and Dr. Barry Rodgers-Gray. Julie Blake and Dr. Barry Rodgers-Gray developed a first draft of the manuscript, based on the results of the systematic review and input/approval from all authors, which was initially edited by Xavier Carbonell-Estrany and Bosco Paes and then circulated among the other authors for input, further edits and subsequent approval. Support for this assistance was funded by AbbVie.
- AbbVie had the opportunity to review and comment on the completed manuscript but final editorial control rested fully with the authors.
- Article processing charges for this study were funded by Abbvie.

## Disclosures

The institute of Louis Bont received money for investigator initiated studies by MeMed, Astra Zeneca, AbbVie, and Janssen. The institute of Louis Bont received money for consultancy by Astra Zeneca, AbbVie, MedImmune, Janssen, Gilead and Novavax. Paul Checchia has acted as an expert advisor and speaker for AbbVie and has received honoraria in this regard. He has also received research Grant funding from AstroZeneca. Brigitte Fauroux has received compensation as a neonatology board member from Abbvie. Josep Figueras-Aloy has acted as an expert advisor and speaker for AbbVie and has received honoraria in this regard. Paolo Manzoni has acted as a speaker for AbbVie, and as an expert advisor for AbbVie, TEVA, MedImmune, AstraZeneca, Janssen, and has received honoraria in this regard. Bosco Paes has received research funding from AbbVie Corporation and compensation as an advisor or lecturer from AbbVie and MedImmune. Eric Simões has received Grant funding to his institution from MedImmune Inc, Glaxo Smith Kline Inc, and received consultancy fees to the institution, from Abbvie. Xavier Carbonell-Estrany has acted as an expert advisor and speaker for AbbVie and has received honoraria in this regard.

## Copyright

Copyright © The Authors 2017.

This slide deck is distributed under the terms of the Creative Commons Attribution Noncommercial License which permits any noncommercial use, distribution, and reproduction in any medium, provided the original author(s) and the source are credited.
